# Supplementary material
Source: PubMed Central journal article supplement (PMC8597758)
Supplement: aac.00291-21-s0001.pdf [file aac.00291-21-s0001.pdf]

## 1 **Supplemental Materials**

### 2 **Supplemental methods**

#### 3 **HPLC and mass spectrometry analysis**

4 Metabolite's extraction: The samples (10mg) were taken respectively and homogenized with 200  
5  $\mu$ L of methanol (50%) which contained internal standard and centrifuged at 12,000 rpm for 30 min,  
6 after leaving it on ice for 30 min. Finally, the supernatant was injected into the LC-MS/MS system  
7 for analysis. LC-MS method: The chromatographic mobile phase was: A mobile phase: aqueous  
8 solution containing 2.5 mmol/L ammonium formate, and D mobile phase: acetonitrile. The  
9 gradient elution procedure for determination of samples was: 0-1.0 min, 70 -40% A; 1.0-2.0min,  
10 40%-5% A; 2.0-4.0 min, 5% A; 4-4.1 min, 70% A; 4.1-7.0min, 70% A: 5 $\mu$ L per injection, flow rate  
11 0.3 mL/min. Chromatographic column: Thermo Hypersil Gold C18 3 $\mu$ m, 2.1 $\times$ 100 mm,  
12 chromatographic column temperature: 30 $^{\circ}$ C. Data were collected in electrospray ionization (ESI)  
13 positive, Spray voltage: 3500V; evaporation temperature: 350 $^{\circ}$ C; sheath gas: 40Arb; auxiliary gas:  
14 10Arb; capillary temperature: 320 $^{\circ}$ C; S-lens RF: 50, NCE: 30. Standard solution preparation and  
15 standard curve: The standard solution with a concentration of 1, 10, 50, 100, 500, 1000, 5000, and  
16 10000 ng/ml was prepared in acetonitrile. Adding 200  $\mu$ L (methanol: acetonitrile = 1: 1) solutions  
17 into 100  $\mu$ L standard working fluids, vortexing for 60 s, and centrifuging at 13,000 rpm for 10 min.  
18 Taken 100  $\mu$ L for analysis by LC-MS. Taking the concentration of each compound as the X-axis,  
19 the ratio of peak area between each compound, and the internal standard as the Y-axis. The  
20 regression operation is carried out by the weighted least square method and the linear regression  
21 equation is obtained.

22 Supplemental figure legends

**A**

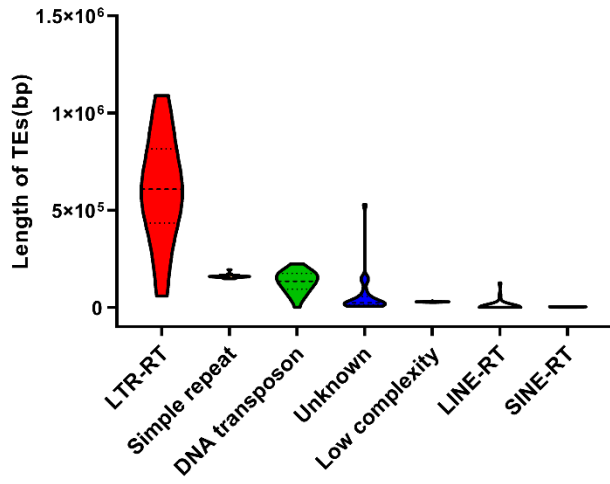

**B**

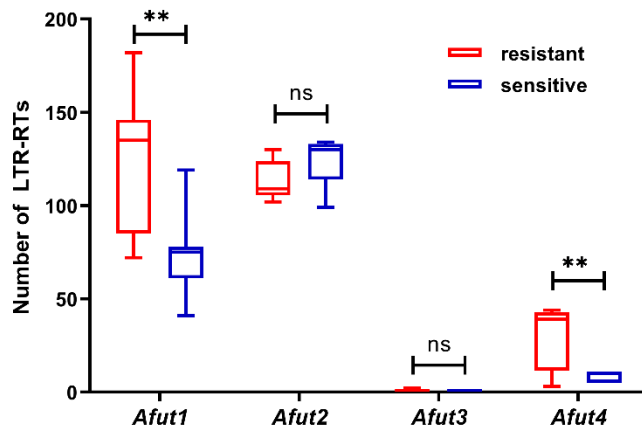

**C**

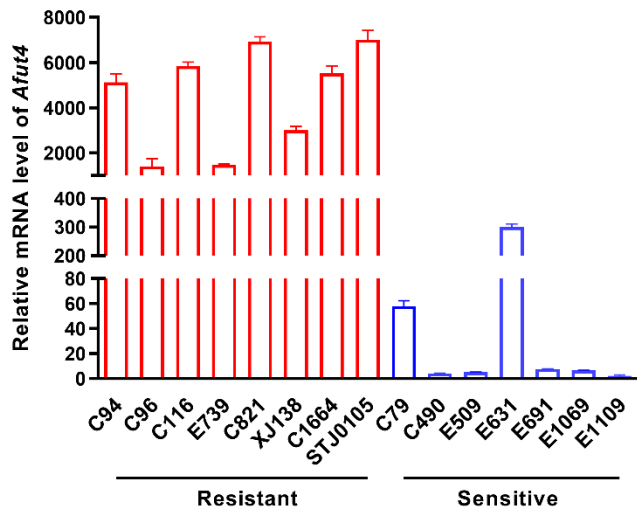

24 **Fig. S1 (A)** The total length of different TEs from genomic sequences of 15 *A. fumigatus*  
25 strains. TEs families were identified by RepeatModeler-1.0.11 based on the repeat  
26 databases (Rebase Update) copyrighted by the Genetic Information Research Institute  
27 (G.I.R.I.). **(B)** The number of four LTR-RTs in azole-resistant and azole-sensitive strains.  
28 *P*-values were calculated using unpaired Student's t-tests: \**P* < 0.05; ns, *P* > 0.05. **(C)** The  
29 specific expression level of *Afut4* in all 15 strains. Total RNA was prepared from the culture  
30 of each strain. Levels of the indicated mRNAs were determined by qPCR.

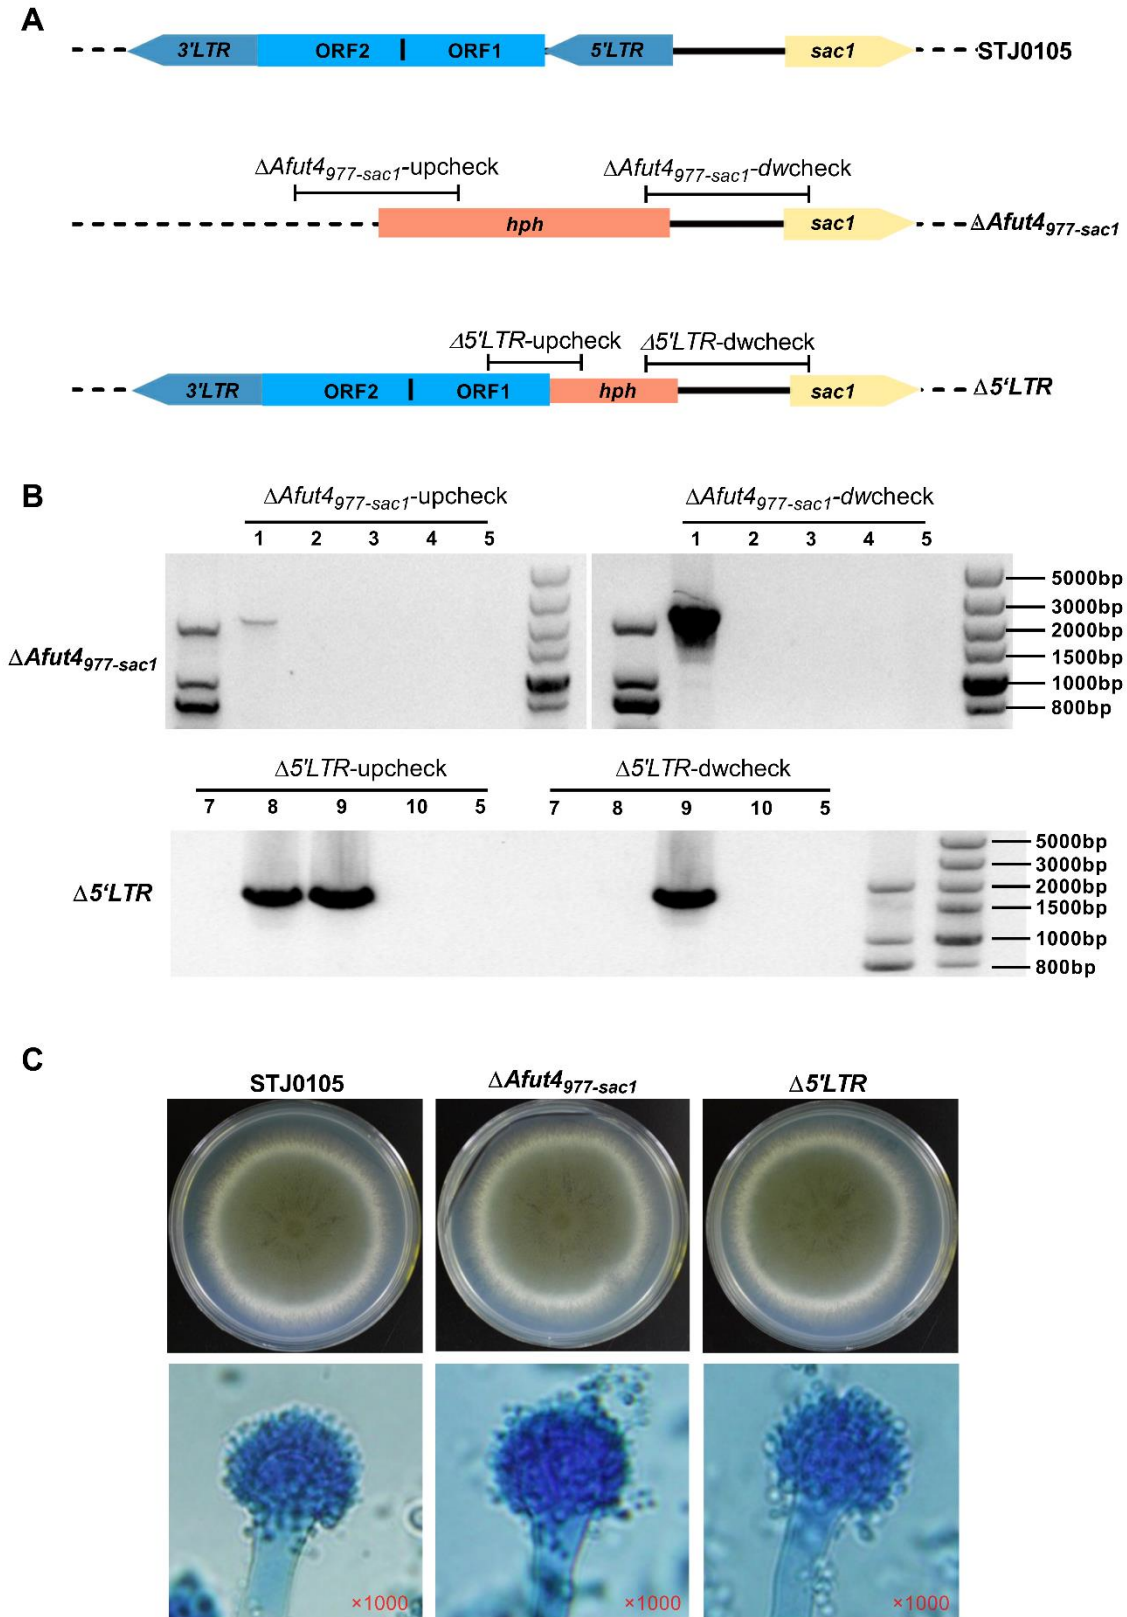

31

32 **Fig. S2 Schematic depiction and verification of  $\Delta Afut4_{977-sac1}$  and  $\Delta 5'LTR$**

33 (A) The strategy of verification of  $\Delta Afut4_{977-sac1}$  and  $\Delta 5'LTR$ . (B) The primer pairs  
 34  $\Delta Afut4_{977-sac1}$ -upcheck-F/R and  $\Delta Afut4_{977-sac1}$ -dwcheck-F/R were used to validate the  
 35 deletion of full-length  $Afut4_{977-sac1}$  (Table S1). The successful verification of both  $\Delta Afut4_{977-}$   
 36  $sac1$ -upcheck-F/R and  $\Delta Afut4_{977-sac1}$ -dwcheck-F/R was  $\Delta Afut4_{977-sac1}$  strain. The primer  
 37 paris  $\Delta 5'LTR$ -upcheck-F/R and  $\Delta 5'LTR$ -dwcheck-F/R were used to validate the deletion  
 38 of 5'LTR of  $Afut4_{977-sac1}$  (Table S1). The successful verification of both  $\Delta 5'LTR$ -upcheck  
 39 and  $\Delta 5'LTR$ -dwcheck was  $\Delta 5'LTR$  strain. The samples 1~4 were the  $\Delta Afut4_{977-sac1}$   
 40 transformants and the samples 7~9 were the  $\Delta 5'LTR$  transformants. Sample 5 was STJ0105.  
 41 (C) Colony and conidiophore morphology of STJ0105,  $\Delta Afut4_{977-sac1}$ , and  $\Delta 5'LTR$ .  
 42

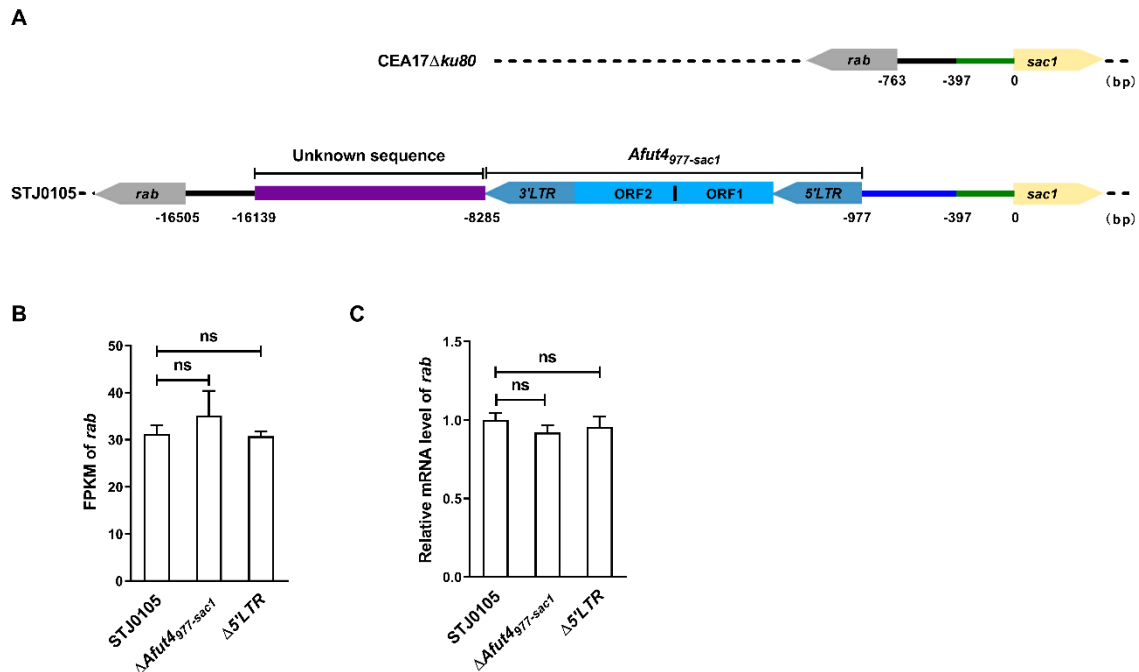

43  
 44 **Fig. S3 (A)** Schematic depiction and verification of the location of *sac1* (AFUA\_4G08050)  
 45 and *rab* (AFUA\_4G08040) in CEA17 $\Delta ku80$  and STJ0105. The yellow tapered rectangle is

46 *sac1* (AFUA\_4G08050) and the gray tapered rectangle is *rab* (AFUA\_4G08040). The 762  
47 bp sequence between *rab* and *sac1* in CEA17 $\Delta ku80$  consists of both the green and black  
48 sequences. The green line is a 396 bp sequence and the black line is a 366 bp sequence.  
49 The insertion of *Afut4*<sub>977-*sac1*</sub> separates the black and green sequence with a more than  
50 15,000bp sequence and the 579 bp blue sequence. **(B)** FPKM measurements of *rab* of the  
51 parental STJ0105,  $\Delta Afut4$ <sub>977-*sac1*</sub>, and  $\Delta 5'LTR$ . FPKM is fragments per kilobase per million  
52 mapped reads. *P*-values were calculated using unpaired Student's t-tests: ns, *P* > 0.05. **(C)**  
53 The mRNA level of *rab* of the parental STJ0105,  $\Delta Afut4$ <sub>977-*sac1*</sub>, and  $\Delta 5'LTR$  by RT-qPCR.  
54 *P*-values were calculated using unpaired Student's t-tests: ns, *P* > 0.05.

55

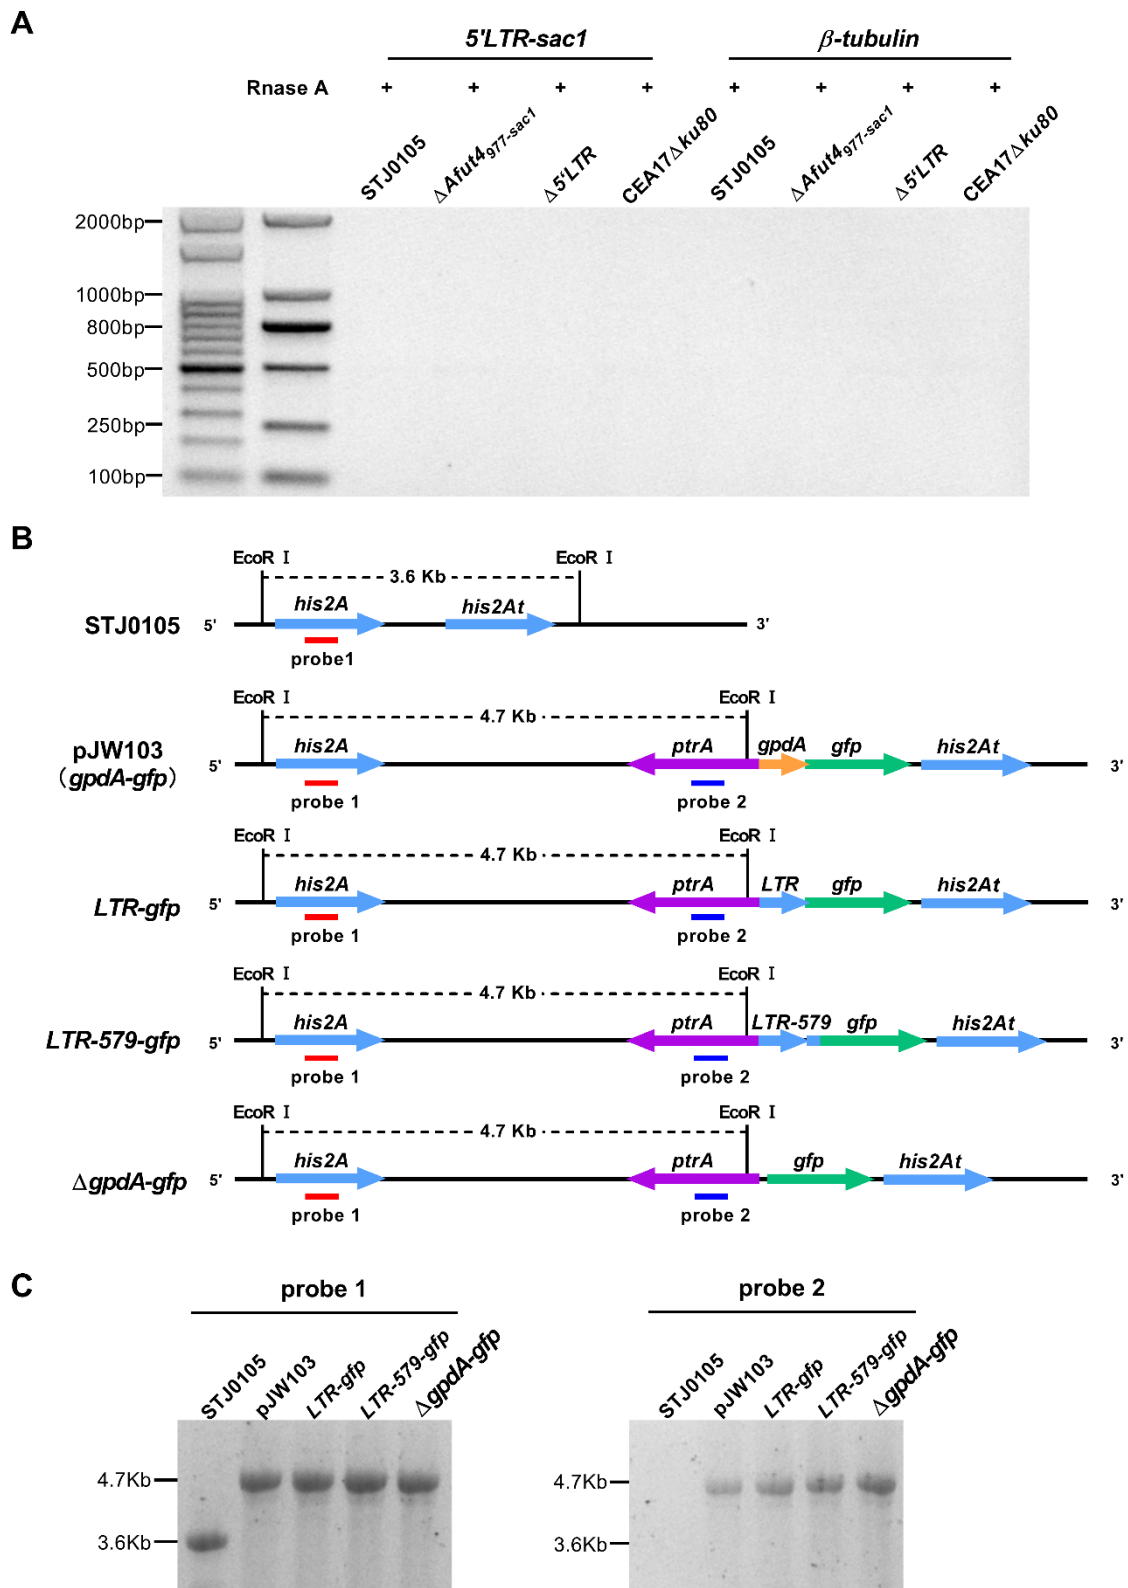

56

57 **Fig. S4 (A)** The negative control of reverse transcription PCR detection of the *5'LTR-sac1*

58 transcript. The negative control: cDNA of STJ0105,  $\Delta Afut4_{977-sac1}$ ,  $\Delta 5'LTR$ , and  
59 CEA17 $\Delta ku80$  were reverse transcribed from the RNA with RNase A added. Then the  
60  $5'LTR-sac1$  transcript and  $\beta-tubulin$  were detected again. **(B) and (C)** Schematic depiction  
61 and verification of single integration of pJW103 or other derived plasmids into STJ0105.  
62 The pJW103 or pJW103-derived plasmids are designed to specifically integrate into the  
63 histone 2A locus of the *A. fumigatus* genome via a single crossing over because of the  
64 presence of *his2A* 3' flanking region, called *his2At*. The genomic DNA of STJ0105  
65 carrying pJW103 or pJW103-derived plasmids were extracted and digested with the  
66 enzyme EcoRI. Probe 1 was designed to verify the correct insertion of pJW103 or pJW103-  
67 derived plasmids into the genome and was obtained by PCR using the primer pairs His-F/R  
68 (Table S1). The expected signal is 3.6 Kb for STJ0105. Following single homologous  
69 integration, the size expected would be 4.7 Kb. Probe 2 was designed to verify the single  
70 insertion of pJW103 or pJW103-derived plasmids in the genome and constructed using the  
71 primer pairs ptrA-F/R (Table S1). No signal is expected for STJ0105 while for plasmid-  
72 carried STJ0105 the expected signal is 4.7 Kb.

73



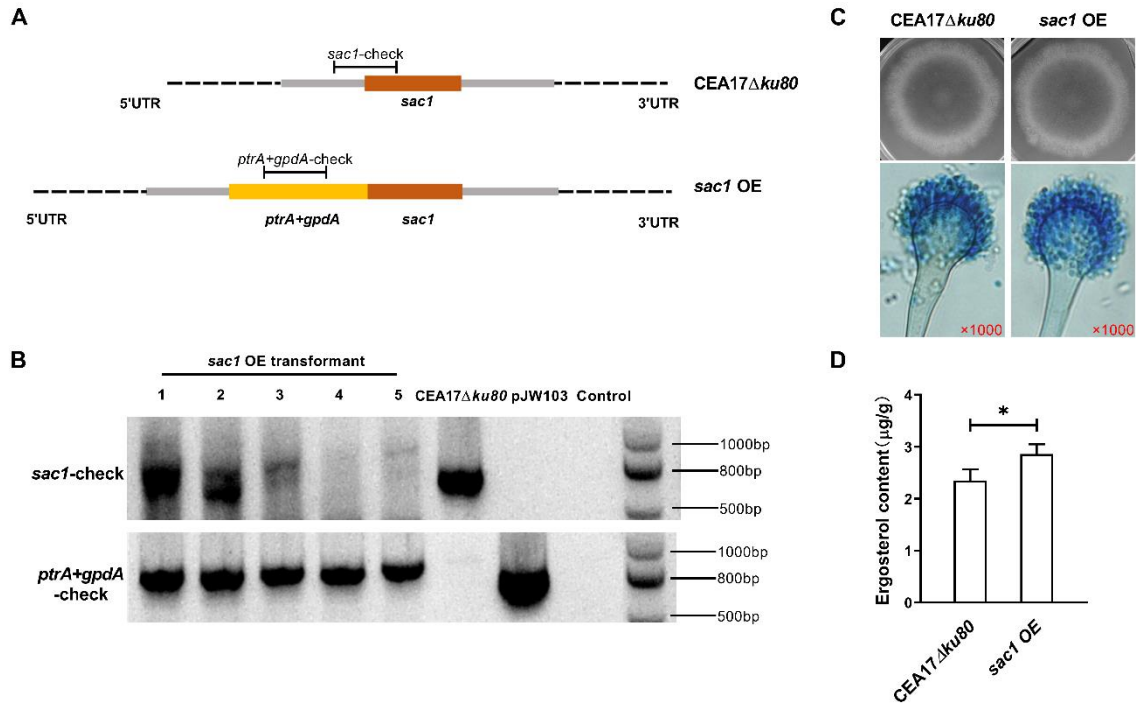

74

75 **Fig. S5 Schematic depiction and verification of *sac1* OE**

76 (A) The strategy of verification of *sac1* OE. (B) The primer  $\Delta$ *sac1*-check and  $\Delta$ *ptrA+gpdA*-  
 77 check were used to validate the construction of *sac1* OE (Table S1). The successful  
 78 verification of *sac1* OE was transformant 4. (C) Colony and conidiophore morphology of  
 79 CEA17 $\Delta$ *ku80* and *sac1* OE. (D) Ergosterol content of the parental CEA17 $\Delta$ *ku80* and *sac1*  
 80 OE was analyzed by LC/MS assays. *P*-values were calculated using unpaired Student's t-  
 81 tests: \**P* < 0.05.

82

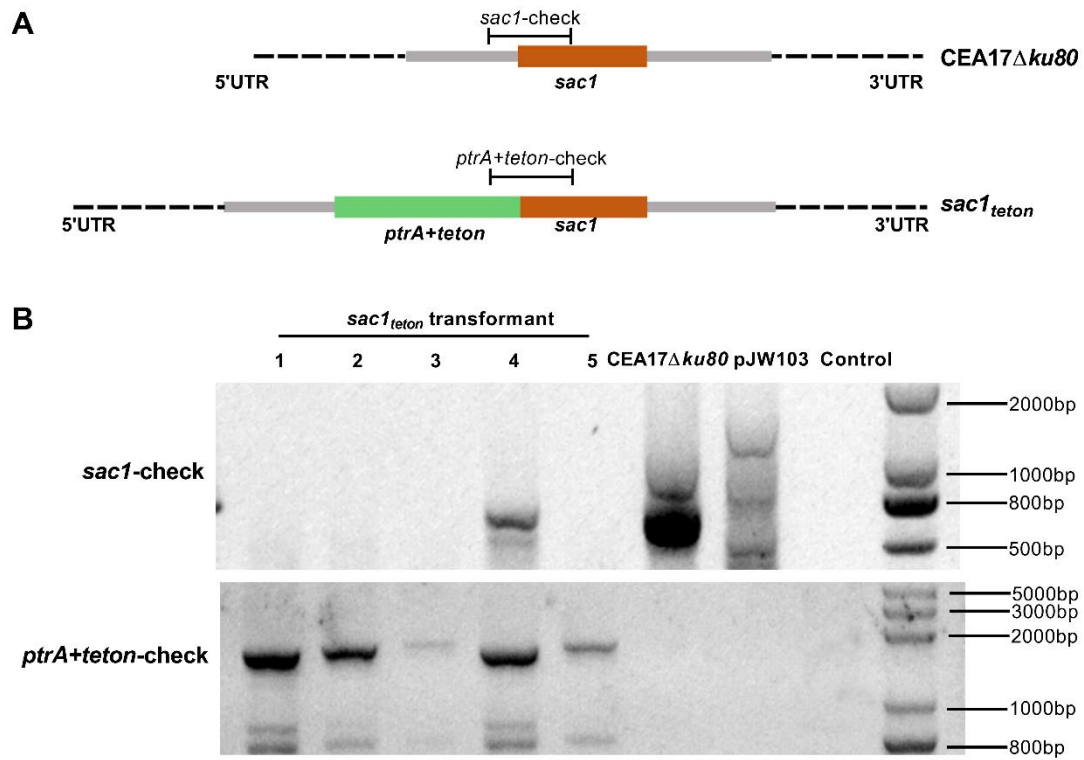

83

84 **Fig. S6 Schematic depiction and verification of *sac1<sub>tet on</sub>* (A)** The strategy of verification

85 of *sac1<sub>tet on</sub>*. **(B)** The primer pair *sac1-check-F/R* and *ptrA+tet on-check-F/R* were used to

86 validate the construction of *sac1<sub>tet on</sub>* (Table S1).

87

**Table S1. Primers used in this study**

| Primer name                          | Primer sequence (5' to 3')                        |
|--------------------------------------|---------------------------------------------------|
| <b>Strains construction</b>          |                                                   |
| $\Delta Afut4_{977-sacI}$ -up-F      | CTAGTCTGTAGCTGCCCTTAACCC                          |
| $\Delta Afut4_{977-sacI}$ -up-R      | GAGCTCCAGCTTTTGTTCGATTCCAACCTAGTAAAGGCAAATC       |
| $\Delta Afut4_{977-sacI}$ -hph-F     | GATTTGCCTTTACTAGGTTGGAATCGGAACAAAAGCTGGAGCTC      |
| $\Delta Afut4_{977-sacI}$ -hph-R     | GGCCTAGTGAGGTAAGATAAAGGAAGTCGACGGTATCGATAAGCTT    |
| $\Delta Afut4_{977-sacI}$ -dw-F      | AAGCTTATCGATAACCGTCGACTTCCTTTATCTTTTACCTCACTAGGCC |
| $\Delta Afut4_{977-sacI}$ -dw-R      | CCAGTTCGGAGCAATTCCTTCA                            |
| $\Delta Afut4_{977-sacI}$ -upcheck-F | CTATTTCCGCCTACTTAGGACATCT                         |
| $\Delta Afut4_{977-sacI}$ -upcheck-R | ACACCCCTGGCTTCACATTCT                             |
| $\Delta Afut4_{977-sacI}$ -dwcheck-F | GACTGAGGAATCCGCTCTTGG                             |
| $\Delta Afut4_{977-sacI}$ -dwcheck-R | CCGCCGCATCGTTGAGTATC                              |
| $\Delta 5' LTR$ -up-F                | TTGGCTAAGTAAAGCAGACCGC                            |
| $\Delta 5' LTR$ -up-R                | GAGCTCCAGCTTTTGTTCGTCATGTTTGTTCAGAGGGT            |
| $\Delta 5' LTR$ -hph-F               | ACCCTCTGGAACAAACATGGACGGAACAAAAGCTGGAGCTC         |
| $\Delta 5' LTR$ -hph-R               | AGCATATCCAGGCTAAAGATGTAGGGTCGACGGTATCGATAAGCTT    |
| $\Delta 5' LTR$ -dw-F                | AAGCTTATCGATAACCGTCGACCCTACATCTTTAGCCTGGATATGCT   |
| $\Delta 5' LTR$ -dw-R                | AACAGTGCCAGGTAGGTGTCTTC                           |
| $\Delta 5' LTR$ -upcheck-F           | GAAGTCTCTGTTGGGCCTTAT                             |
| $\Delta 5' LTR$ -upcheck-R           | CTTCACATTCTCCTTCGCTTACTG                          |
| $\Delta 5' LTR$ -dwcheck-F           | TTTCATTTTCGGGAGACGAGATC                           |
| $\Delta 5' LTR$ -dwcheck-R           | CTGAGATTGACGCTGGAAGCTGT                           |
| <i>sacIOE</i> -up-F                  | CGACGACTGTTTGCCAATT                               |
| <i>sacIOE</i> -up-R                  | CAGCGCGAGTGTGCTGAGTAATGTCAATGTCTCCCAGTGTTG        |
| <i>sacIOE</i> -ptrA-F                | CAAACTGGGAGACATTGACATTACTCAGCACACTCGCGCTG         |
| <i>sacIOE</i> -ptrA-R                | GAAAGGGCAGCACAGAAGGAGCCATGTGATGTCTGCTCAAGCGG      |
| <i>sacIOE</i> -dw-F                  | CCGCTTGAGCAGACATCACATGGCTCCTTCTGTGCTGCCCTTTC      |
| <i>sacIOE</i> -dw-R                  | TCCGGACGACGCTTGACT                                |
| <i>sacI</i> -check-F                 | ACATTGTCGGTTGGTTTGG                               |
| <i>sacI</i> -check-R                 | CGTGAAGTCCGTCTTGAGG                               |
| <i>sacI<sub>ter</sub></i> -up-F      | GAAGTCGTTCCAGATCTATACCCTA                         |
| <i>sacI<sub>ter</sub></i> -up-R      | ACCACGAACCATATTAATGATGTCT                         |
| <i>sacI<sub>ter</sub></i> -ptrA-F    | CTGTATCGACAACGAGGCTCT                             |
| <i>sacI<sub>ter</sub></i> -ptrA-R    | AGTTGAGCTGACCAGGGAAA                              |
| <i>sacI<sub>ter</sub></i> -dw-F      | CAGGACTACACGGGCGTC                                |
| <i>sacI<sub>ter</sub></i> -dw-R      | TTGAGCAGAGGCATTGGAAG                              |
| <i>sacI</i> -check-F                 | AGAGCGATGAAGGCGGGATC                              |
| <i>sacI</i> -check-R                 | AACGAGCGTCTGAGCATTAGGT                            |
| <i>teton</i> -check-F                | TACTCCATCCTTCCCATCCCTT                            |
| <i>teton</i> -check-R                | GAGACAACATCGGCATTATCAGC                           |
| <i>ptrA+gpdA</i> -check-F            | GCGATGAAGTGGGAAAGCTC                              |

|                                      |                           |
|--------------------------------------|---------------------------|
| <i>ptrA+gpdA-check-R</i>             | TTACATTGTCGGTTGGTTTGG     |
| <i>sacI<sub>ter</sub>-up-F</i>       | GAAGTCGTTCCAGATCTATACCCTA |
| <i>sacI<sub>ter</sub>-up-R</i>       | ACCACGAACCATATTAATGATGTCT |
| <i>sacI<sub>ter</sub>-ptrA-F</i>     | CTGTATCGACAACGAGGCTCT     |
| <i>sacI<sub>ter</sub>-ptrA-R</i>     | AGTTGAGCTGACCAGGGAAA      |
| <i>sacI<sub>ter</sub>-dw-F</i>       | CAGGACTACACGGGCGTC        |
| <i>sacI<sub>ter</sub>-dw-R</i>       | TTGAGCAGAGGCATTGGAAG      |
| <i>ptrA+tet<sup>r</sup>-check-F</i>  | TACTCCATCCTTCCCATCCCTT    |
| <i>ptrA+tet<sup>r</sup>--check-R</i> | GAGACAACATCGGCATTATCAGC   |

#### Plasmid construction

|                         |                                                    |
|-------------------------|----------------------------------------------------|
| 5' <i>LTR</i> -up-F     | TCCTCGCCCTTGCTCACCATGTTTAAACTGTCGCATAGCGTACGCT     |
| 5' <i>LTR</i> -up-R     | GGCCTGAGTGCCATCGAATTCCTGCAGGTGGCAGACTAACATGAT      |
| 5' <i>LTR</i> -579-up-F | CGCCCTTGCTCACCATGTTTAAACTCCGTGCCATACGCACCC         |
| 5' <i>LTR</i> -579-up-R | TGAGTGGCCATCGAATTCCTGCAGGTGGCAGACTAACATGATTTGAATGG |
| Blank-F                 | TCGCCCTTGCTCACCATGTTTAAACGTTTAAAC                  |
| Blank-R                 | TGAGTGGCCATCGAATTCCTGCAGCTGCAG                     |
| pJW103-check-F          | AGCTCGATGCGGTTACCAG                                |
| pJW103-check-R          | TCAGCGGCACCCGATTCTAT                               |
| His-F                   | GTAACTACGCTCAACGTGTT                               |
| His-R                   | GAAAGCTGTGCGGTATCATTC                              |
| <i>ptrA</i> -F          | CTTCCTGTTGATGGAATGG                                |
| <i>ptrA</i> -R          | GACGGCGCATGACCATAG                                 |

#### q-PCR or RT-PCR

|                        |                           |
|------------------------|---------------------------|
| qRT- <i>Afut1</i> -F   | GAAGTCGTTCCAGATCTATACCCTA |
| qRT- <i>Afut1</i> -R   | ACCACGAACCATATTAATGATGTCT |
| qRT- <i>Afut4</i> -F   | AGATCGCATCTAGGGAGTGAAGT   |
| qRT- <i>Afut4</i> -R   | AGGTGCGGAATGCTATCTTCT     |
| qRT- <i>sacI</i> -F    | CGATTTCCACAATGAGACCAA     |
| qRT- <i>sacI</i> -R    | TTCAACCCACGGAAGTAGC       |
| qRT- <i>gfp</i> -F     | TGCCGTTCTTCTGCTTGTCG      |
| qRT- <i>gfp</i> -R     | GTCCAGGAGCGCACCATCTT      |
| qRT- <i>tub1</i> -F    | CTGTATCGACAACGAGGCTCT     |
| qRT- <i>tub1</i> -R    | AGTTGAGCTGACCAGGGAAA      |
| qRT- <i>rabF</i>       | TCTTGCTTGGTGAATCTGCTG     |
| qRT- <i>rabF</i>       | TTTGACCGTTGTGCTTTCGT      |
| 5' <i>LTR-sacI</i> -F  | AGATGGGGCTATCTGTCTACCTGT  |
| 5' <i>LTR-sacI</i> -R  | GACAACGAGCGTCTGAGCATTAG   |
| <i>sphk-692/392</i> -F | TGACTTTGGGTAACGATGCTCTT   |
| <i>sphk-692/392</i> -R | TATCTCGGTGGCGTGTCTCTC     |

---

The DNA sequences ranging from the gene *rab* to gene *sac1* in STJ0105.

>STJ0105\_ *rab\_Afut4\_sac1*

TTAGCAATTGCAAGCTCCGGCGCCCTGCGTGCCAGGTGCTTCCGGTCGCAAGTCCACA  
CCGGGACGAGGAGTGGTGCAGATTGCGCGGGCCCGCTGATCGAGAGGGAGTTTC  
TTGGCGATTGCGGCGAATAGTTCCTTCACATTTGTCGAAGTCTTCGCAGATGTTTCGAA  
GAAAAGGAGTCCGGCTTCGCGCGCATAGGCTTCGGCATCAGCAGTCGGAATGGCTCTC  
TTGTCCGGATGTTCCGTAACATAATCCAGCTTATTGCCAGCGAGGGCAATGACAATATT  
CTCGTTCGCCTGTCGCTGCAACTCCTCACCCATGACTTTGCCTTGTCCAGCGACGACT  
GTTTGCCAATTGCCCCGAGTTAGTCTTTCAAAGTAGCCTGATATTAGAGAAGGTGATCGG  
GGCGGTACAGCCTGAGTGATATCGTAGACAACAACAGCACAGTTCGCATTCTGTAG  
TACATTGGAGCCAAGGACTTGTATCGTTCCTGACCAGCGGTATCCCATATCTCGAATTTG  
ACCGTTGTGCTTTCGTCCAGCGAAATGGTCTGTGTTAGGAAGGCAGCGCCGATCGTCG  
ACTCTCGGTAGTCATCAAATTGATCCTATGATATCCGTTAACATCTAGGCTGTCCCCATG  
GGCCATCAGGCACCAGAGAAGAAGAAGAAAGCTCACTTTGACAAATCTTAGCACTAA  
CGAACTCTGGAGGATAAGATGTCAGCGACCGAAAGAACACCCATAGACACTATAAGGA  
GCTCTAACCTTTCCAACAGCAGATTCACCTACAGATAAAACATGGTCAGTAATTTAACT  
CAAAACAAATGCAGCAAGAGAGAACGAAAGAATAAGGCTAACCAAGCAAGACAAGC  
TTGAACTGGGCGAATCTAGCACCCGGACGGGTTCTCGCGGCGCTCTGGAGGCCAT<sup>1</sup> G  
ATGACTGATTTGGGAGAAGCACAGGACTTAGGAGGTATCTTAGAATTCAAGCGCCGAG  
ATCTTTGAAAGTTCCAGTGGTATAAAACCGAGGCAAGAGCGTTCCTGGAAGATGGTTTG  
AGAGCGATGAAGGCGGGATCGGGATACCGGGGAGGTTTGATGGCGGGCTGCTGGTTA  
AGGCAAGGTTACTACTGGGGAGTCTTGTCTGTAGCAGTCTGGGACACAAGCAGATGAC  
GAAGGGGGTCAGCCACAACCTGGCTTTGCAGGGCCTAAGGCAACTTAATAACCTGCGG  
GGCGGTGTGGCGCTTCCAATAAGAACGTATTTATGTTAGTCCTACGTACCTGTAGTTGTA  
GGTAGTACCTAGGCAGTATCCGTGCCATACGCACCCTCACCGCTTCCGCGTTGAGGGTG  
CGCTGCACTGTAACCACCAATTGCACTGTAACCACCAAAATCAGAAGGAAATCAAATTT  
TTGAGGCTATCCCAACATTAATCTATATAATAAAAATCACCATTCTCATCTGCTGCCTCT  
GCTGAATCATTGATATCTTATTCTCCTGTGTAGGTGCTGGTGGTGGCATCTTACTATAACA  
CCTTCTCCTACTACTGTTGTAATCACCTCTCCTGTATAGCAGCTTCTTTAGCCTTCCTTAA  
AGCAATTGATTAATTTGCATTATGTGTTCTTAATACTATCCTAGCTAAGTGGCTTAACC  
TGCTGCTTAGTATGTTGGCGCTGTAGAGGGGCTTGCATGGCTCTAATTCAACTAATAGTT  
TTATTTGCCATAGCCAGGTGCTCTGTGGTGTATATAATTATGTTGAAATATCTGTTCAAGAT  
TCTGCTGCATCTTTAGGGTAAGGAGATCTATATATTTAAATAGCTTTAACTATTAGCTTTA  
GAATAGGAAGATTTATAGAGTATTATATCTTTGCCTAGTCTTCTCTAGTGCCTAAATTGT  
TATTGGAGGTGAGATATTAATGCTAGAAGAAGATGCTGGATGAGAAGGTGTTAAGGGA  
GTAGACTTATAAAGATCAGGCGTGTAGATATCTGGAATTTACTCCTATTATTGTAAGGCG  
ATCGGAGGTAATCAACCTAGGGGGTCTAGCCAGCGATGCGACGGCGACTAGGCTGCG  
GCTATGGATAGGAATACTGGGTTTCAGGGATGTATAGATGTATTGGTGAAAAATATATAT  
ATGTTAATAATCAGAATAAACTGCTTGGTCTCCCCTAAGCTATTTAGAACTCCTATTTCT  
ACTGAGTGTGTTTAGAATTAGGTATATAATTACCTAAGTAAGAGGGGGCTTGCCACTGG  
CAGCTTGCTGGACTTATATTATTCTGAGTATATAATAACTACCCCCCCCCTTTGGAGAGG  
TTTATCCTGAACTATGCTAATCCTAAAGTAGCTATTAAGGATTAATACTAGTAGTTCTTTG  
CTATTAATTATAGTTAATAAAGGGCTTTATATTAGTATTTAAAAGGTGTTAGAAGGATGTT

<sup>1</sup> AFUA\_4G08040 RAB GTPase Ypt5, putative

AGAATACACTGCATCAGTTCTTAATGGAATTATTATCTTCCTTAATAGGCTTTATCTAGTG  
TGGCACTAGTAATTAGTTAGATTCCCCTAGCTATTATAATATTATAGTATTGTCTTATTAAT  
ATACTATTATATCCAGCCTTTATAATAAGTTAAGAGTAAATAATTAATGAGTATGGTAGTA  
AGGTCTTATTAAGTAATTAAGATTAATAGGTATTAAGGATCTAGTAGTGTTACTTTCTTAG  
TAGTATAAATACTAGCAGTTCCCCCCTTTCTCTTATTAATTTAACTCTTTAATAATATTC  
TATTTTTTTTTACTAATAGTCCGATGTGCTATGCTGCTTAATATACTTATTAATATTCCT  
AAACTCCTGCTTACTTCTATAAGGAGAAGTGTTAGTAGGCTAATGCTTCTCCCTTACCTT  
ATTTAGATAGTTCTAGTGTAAGTACTTATTTTATAGAGTTTAGTTACCTTAGGTTAAGCCT  
ACTAAGCTGATAAGGAGGTAGTCTAGTAATAAAATCACTATTTCCCCTGCTGTTTAGTGC  
TATTATATTACTTTATCTACACCTACTACTATAGTAGCTGATTATTCCTAGTCTAAGTCTAT  
CTTTTATTCTGCCTCCCTATTACCCTCCCTATCTATCTCTTACTATCCTATAGGCTGATA  
GTGCTATGCCCCTCCTCTTTATAGGTTATTAGTGCTGTATTAAGTAGAAGTAGTAATAGG  
GGGTGGCCTGTTCCCTATATTTAGGTAATAATTAATTATAAGTATTATTACTACTAGTATTTA  
AAGAAGTTATATAAGCTAGTCCCCCTATAGCTTATTTACTGAGTTGCTATGTTTTAGAAG  
ACTCTAATTAAGTATAATACTAGGGCTATTATAGTATTATATAATAAGATAGAGGTAAT  
AACAGGCTTTATGCCTAAGTATAATATAGGTAAGGTTATTTATGCTCTGCAGTTGATTAAT  
TATACTTATTTAAGCTTTATATTACTATAAATAATAATTATAGGATGTCTAACCCCTGCCCT  
TAAGGATAAGACTATAGTATTTTAGAAGCTTACTAGGGTTACTAGTAAATCTAGTAATAA  
GGGTAAGGAGTAGTAATTAATCCTATATCTATCTTTTTATAATATAATACTACTACTAGTAT  
AGTAAGGTCCCTGTTTTATATAAGCTTTATATAGACTATAGTTATAGACCCATTCCCTATTA  
AACCTCTAAATTCTATAGGAAAATAGAGGAAGGTTTACACTATTATGATAATAGGTAGGA  
GCTAGTAGATAGTAAAAATCTTATAGGAAAAAGGCTATCTCCTTCCTCTCTTTAATGGG  
GCTGCTCTGTAGCCTGTCTAGCTTGCTCTTTATATATATTTAGTATATCTATAGCATTAACT  
AGGTTATCTTCTAGTTCCCTATGAGTTCTTATAGTCAGGGAATCCTTTCTACTTGACTAGAT  
ATTATATCTCTCCCTATTAAGTCTATTCTGCTAGTATGTCCTTTATCTCCTATTCCCTCTTCT  
CTATTAATATTAAGGGGCTAGGGTTCTAATAGTGTCTTATTATTACCCCAAGGGTTCTACT  
TCTTGAGGAGGGATATATAGAAGGTAGGGTGGATTTATCTATATAATTTTAGTAAGCGCA  
GGGTGTATGCCTGCTTCCCTATAATAGTAATAATTTAAACAGCCTGTTGTATTTATTATT  
AAGATTCTTATATAGACACTATATTCTTAAGTTTCTTAATAAGAGTAGCACCTTTTCTTTA  
ACAGAAAATAAGATATCCTAGTGCTTCTAGTTATAATATCTAGCTTATATCTCCTAAGCTA  
CTACTAGGTAAGTCTCTAGCTAGTTTTACAGATCCTAAAGTGCTTTTAGGCATTCCCTCTA  
CTATCACTATTAATAAATTATTAGTAATATTAGTAAGCTGGGGTAATACTAGAATATAGCT  
ATAGGCAGCCTTAAAGAGTGTGATTTTTGTTAAGGCGTGCAGGGTATAGTTATATATAAA  
CTCTACTATCTGTAGCTATATAACCCAGTTATCTTACTAGTAGTTAATAAAGATCCTTAAG  
TACACCTCTAGTATCTAATCTGGTGTTCTATCTAGCTATTAGTTTATGAATAAAACACTA  
TACTTATCTATTTCTTAATCTTTAAGGATCTACAGAAGTTAGTCTAGTAGTAGCTAGTAAA  
TAGTATATCCCTGTTAGTTACTAGGCTTCTTAGTATACTATATTATAGAACAACCTTTTCTA  
AGAATATATTAGCAAGTTCCTCTGCAGTAATTATCTTTCTAATAGGGATATATTTAGCTAA  
GGAATAGGAATTCCAGACTTCCTGCCCCTACTAGCATGCTATAAATACTAGGGTTATTTA  
TACTAATCTAGTTTAACTATAAGCCTGGTATTAGCTTCCCTCTAAAGTATAGGTAAGAGGC  
TAGCTCTAGTTTCTTTATCTTTAGTTAGCTTATAATCCTAGTATCTTAATAGTATATCTGCA  
GGGTTAAGCCATCTTAGTTTATATTTAATTATAAAATCATAGGCTGTGAGTAACTCTGCCT  
ACTAGGCCGTCTTATATTCAAAGTCTTAGTAGTAAAGAAGTAAGTTAGGTTTATATAGT  
CTATCTAGACCCTAATTAGGTAACAGCTACCTTCTAGGTAGTGTCTCTAATACTTAAAGT

ACTTAATAATTATAAGCAACTCCTAGTTATATACCTTATACTATCATTTCAGCATTATAAAGC  
TTTCTTAAGTAGAATATAATTAGGCGCTAACTATAGCTACTATATATCTTTATTAAGTCACT  
ATTAGACTACAGGAGAATACCTGCAATTATAAAACCTAATATATTAGTAATAAGGAGGAT  
CAGCTTCTCAGGGTTAAAATAAGTAAGGATTAGGGTTTTAATAAATACATCCTTTAGGTC  
CTAGAATGCCTTCTAGGCCTCCTCTATCTAAGTAAAAGGCCTAGACTTATACCTATTCTT  
TACCCCTTCAGCAGGTTTGTAGGGGAATAGTGATCTATAAGTACATCTTAATAAAGTA  
TTAGAAGAATCCTATAAACCCAGAAAAATCTAAATATTATAGAATGAGTAAGGCACTA  
GCCACTTACTGATGGTGCTAAGTTATATAGGATCTACCTAGACCTCTTCCTAGCCTATAA  
GAAAGCTGAGAACTTAACTTCTGTCTTATAAACTTATATTTAATAGTTTAGTATATAG  
GTTACGCTATTAAGATACTGGAGAACCTCCTTAACATACTACTTATATTCCTCTTCTGTC  
TGTAAGTAGATAAGAATATTATCTAGATAGATAATATAGAACTTATTAAGAATTCCTACA  
TCATCTTATTAATATAAGCCTGGAAGGTGGCTGGCGTGTTAGTTAGTCTAAAAGGCATA  
ACTAAATATTTAAATTAGCCATAGCAGGTGTGGAATGCTATCTTCTACTTATCACCCCTGC  
TATATATAAATATAATAGTAAGCATCCTATAGATCTAGCTTAGTAAAGAACTTCACTCCCT  
AGATGTAATCCATTAATTTATTAATCTAGGGTAAGGGGTATTAATTCCTAACTATAATAGT  
ATTCAGCCCCTAGTAGTCAACACAGAGACATAGGCCTCTATCTAGCTTCTTTATAAAGA  
GTAAGGTTACTACTACTAGGCTAGATAATCCCTAATCTACCCCTTCTTAAGTATTTTATT  
AAGGTATTTACACAGAGCCTCTAGCTCTAGCTATAATATAGTAAACAGGGGGCTGTATG  
GCGGCGACTTCTATTAAGTAGTTATATCTTATAAACTACTCTGTCTGAGGGCAGGGTGC  
TAGCTTCTTTTCTAAAATACCCTAGTATATTCCTAATACTGCAGTAGTATTCCTAGATT  
AAGGGCTTTATATTTAGCCTAATTAATTATAAAGAGGAAAAGGTCCTTACCCTATGACTT  
CTTAAGGAACTCCTTTAGCTCTAGGATCTTAATCCCTAGTAAGTTAACACAATAATACCA  
GCTACTTACCCTCTAATTAATATCTAGGTTAGCTTACTAGAGCTAATTCATCCTAAGACT  
ATGTTATACCTTATAATGTTAATAATTAAGAAGGGAATCTAGAATATCTTTTTAGTTAATT  
CCCTATCTATCACTAATACTAGTAATAACTATTCCCTATAGATTTTTACTTTTAAGCTATTA  
GTGAGTTCTATAGGAGGAAGCATTATATTTTTTAAATAGTATCCATCTATATTATAAA  
TTAGTATAATATATAGTTAGGCCAGCCCTAGAGTCAAGGAGTACCTTAGTTATTATATCT  
ATCCTATTAACTATAGTTTTAATCTTAGCAAGGACAGGAGGTGCTAGTGTTCCCTAGTA  
TAGCATAAGATATTAAGCTTCTAGGGCTTGGGTTCCCTATTATAAGGGAGGAGGCCCTTA  
GGGTGGAGTGCCTCCCCTCTGTTAGGCTCTCTTTAGGTAGATTAGGAGGAGGTACCCCT  
TTTCCTTATAGTAGAAGCAGTGTCCCTCCTTCTAAAGCTAGTCCTTATTACTAGGTGGTC  
CCTGCCTATTATTAGGTTTTCTGGCAGGTGCTTATTAAGGAGGAGTCCTTTCTTTTAG  
CATTACTAGTAGCTTTTAGGGGTGTCTCTAGTAAGCTACTATATTGCTATTTCCGCCTACT  
TAGGACATCTGCCTTCTATAGATAGTAGTTATAGTTATCTATCCTAGTTAACTGTGAGGTA  
GTAGGTCATCCTTCCCTACTATAGGATCTTATCACACTAGGCTATAAGGGCCTTAAGGTGG  
TCTAATAATTAATTATAGCTAGGCATGCGCTAGACTTCTGCCTTTATATTAGGATATAGTTT  
CTTTATAGCTATCCTTATCCAGAACTACTCTAGGCCTGGGCTAGGCTTAATTATATTTTAT  
AACTCTTGCAACTCTATAAAGAAAGATTAGATATATCTTATACTAGAGCTATAGAAGC  
TAGTATACAGTAGTATTCCAGCAGTCCCCCTATAGTTAATATAGTCCTATAGGAATTCCT  
TAAATTCCTTGTAAGTACTAGCCTTATATCCCTTAGAGTACTGCTCCTACTAAGTATTCTAAC  
ATCTATACTAAGTTAGGAGGTTGTGTATAGGATCTTATTTATATTATTATAAATATCTAGG  
GCTTAGCTAGGTAGTATTCAGAGAGGTTATGTAGGAATATCTTAGCTTAGTGCTAGCGT  
AGGCCCCGCAGCCATCCTATATAGCTGGGTTGGCTAGCTTAAGGCCCTTAATTTATTAT  
TATGCTAGTCTGTAGCTGCCCTTAACCCCTAATAAGCTAAGTAAGGCTAGCCTAGTCTA

GCATAATTATTAGGGCGGTATTACTAGTGACACCTAGTAGTATAGAGCCAGGATTATAGT  
TATGTGCAGGCGTTATGCTGCTAGTCTAAAGTAGTTAGAATATATTTACTTCTAGGGTCC  
TTAACTCACTGGCTACCTAATTTGTAGAAGGGGGATTGCTATATAAGGCTTCCATAGGGG  
ACCTATAGCTATACTTAAAGGTTAATTTCTTAACTAGATTCTAGATACTAGTTTAGTAGGCC  
CTCAGAGTCCCTATTATTAGACTGGTTGGTATATTATTAAGTATTTATATCTAGTAGGCTG  
CAGGGGAAGCAGTTTGAACATAAGGTAATTAGAGATAATTAACCTAGGGGGTCCTAGC  
TAGTGATATGATAGTACTAGGCTATGGCTACAGATAGGAATACTGGGTTTCAGGGATG  
TATAGATGTATTAGTGAAAAATGTATGTGTGTTAATGATCAGAATGAACCACTTAGTCTC  
CCCTAAGCTGTTTCCAGAACTCCTATTTCTACTGAGTGCATTCGGAATCAGGTATATAATTA  
CCTAAGCAAGAGGGGGCTTGGCCGCTGGCGGCTCGCTGGGCTTATGTTGTTCCGAGCAC  
GTGACAATTATAAGATAGCAAGATCATTAGCTATCTTACTATTAACCTGGCTAGATTCTATG  
ATCTTTAAAGGCCTCACAGATAATCTATTAGTTAAAAGCCTTCTCCTGTACTAGTCTAAT  
TACCTATAAGAATTCTGCTTTCTCTACTGGTTTACTAGCCTAGTAAGATAGCTTATTATTT  
ATATAATAAAAGTATTGCTTATAGCTTAAAGAATAGCTTGCTATCTAATGGCTAGTAAAGAT  
ATGTTATATAAGGAAGGAATCTAAAGGGAATAATGCTATTATCTTTATAAAGTTATAAGA  
ATTTAATAGTGAGGTAGGAGCTATGGCTATTAATAGAAGTATCTATTTCTCTCCCTTCT  
AGTATACTTATTTATTACCTTAGTAAAGCTTTAAAGCTATTAACAGCTATTTTCATCCGAT  
ATCTAGCTATTAGAAGATGTTGCTATTATAGTATCTAGTAGTAAGGCCTTACTTCTATTAA  
ACTAAGATTTATAAAGGTACCGCTGCCTTTAACGAAGAAAAGGTTAGTATTAGAAGG  
GAAGAATTAATAGAATCTTACCTTTAAAGATAAACTAAGTATCTATATGCCATCTGTCTAT  
AGATATATATTTAATAGCTATAATTTCTCTCCTCTTTCAGATTTAGCAAGATTAGGGACT  
TTCTCTTTCCCTTTTGAACATAATTACCTTCTAGATTTGCCTTTACTAGGTTGGAATCTAT  
ATTTATTAAGTTATATACTAACTATACTAGAGTATCTTTAATTATATTTGCAAGCTAATTT  
GTGGCAGACCAACACAATTTGAATGGTAAGTTGATTGTATTCTCATAAGATGGGGCTAT  
CTGTCTACCCATCTTGGATAACAGTATAGTTCAGCAAAGGAACCAACTGCGCAACGGG  
ACGGATAAACTATAGGCTGTTAGATACATAGATAAGTAATACATAGATTAGCGTATACTAT  
GTGATATTATGGGGGCCAATAAAAAGCAACATCCTCATTGCTGTAAAACCAGCCTGCT  
AGCATTACATAGGATAGTTATATTTAAATGCCTTAATGAGTTCAAGAGAACCTTAAAGAT  
CATCTTTACAAACCTATTAGTTGTCTTCTGGTCCGTATCCCTTCTACTGCATAAGGTATTC  
TACATAAGGGGTATATTTACATCCATACTGAACAGTACACTTATCTAGCAAGCATTAAAC  
TTTGTATATATCATCCTCACTAGGGTAGACCTCAGCATTAAACAACCGCGGGAGGCTTCA  
GTAACCTATGGTGGAATAGATTAGGGGTGGCTGGCACAGGTTTAAGGTGGGCAATAGA  
CAAACTGGATGGATCTTCTATATAGAGGGTAGTTTAAATATAGTAGGCCGAGTCTTCTAAT  
ATATTCTAATATGCAGAACGGTCCAGTATTCTGTAATTAGAGCTTATAATTAACCTACTTA  
GTTAGTAGGGAATAGCCATAATGTAGTTAGATATAGACCTGATCACCAACGCGGAATTT  
AATTAGTTTATGATTCTAATCATAGATCTTTTTATGTGTATGGATGCGTACTTCATAGATT  
CTTTAGTATTAAGTCATACTAAGAAGTCTTGCTTAATAAATTACTTTAGTAGCTACTATAG  
TTAGTAGAGGTTAATACTAAAGAGCAGTTAGTGTAGAGTGGCCTTTGTAGATTTATTCA  
GTGACCCATTAATTATAGAGATGATACTTAGTAGATCTATTGTCTAGCAAAACAGATCAG  
GTTATTTAGCAGTAGTGTAGGAATAGCATAACATAACTTTAATGACTTGGATAATATGTT  
CAGTCTGACTATTAGTCTATAGGTGGAATGCTGCTAAGTATAGCCAGCATGCTTTTAGTA  
TAGTAAAATAGCCTTTCCAGAACTTGCTTATAAAGATGGAATTATGATTAGAGATAAAG  
AAACAGGGCATTCCTAATTATATTCCTAGAAATATTACAAGATGCTAGATCCCCATTCC  
TAAGTAGTCTATGTTAATTTACTAGGGATGAGACCAATGCATTTACTAAATTTATCAACA



ATGACTAATAGTTAATTATAGCTATTGTCGTCAGGTAAGCCTATAATAAAAATCCATAGTAA  
TAATCTCAAATGGAGCAGGTGGGACCTGTAGGGGTTAGAGGCTTCTATATGGCTTATGA  
TAGCAGATCTTATTCCGCAAATAAACTAGATAGTGTTAATATACTAATATAGTATATAGT  
GGCCTTGGTACAGCATAAACCCATTAAGTAAAGCCAGGCACTTATCAATGCCTTGATGA  
TTCTATTTATCATGGATTAACCGGAACATATCCTTTATAAGGGGATGTGGAATGTAGATCC  
AAGGTTCCCTCAGTGATTTTCCCTTGTTAATTAAGTAATGTTTCATCATGTAAAGGAGTCCA  
TTATTATCTAATTAATAGAGTAAGACAGTAGGTAAGTCAGATATTTGGTTATTACAGAGG  
ACCTTAATAATATATATGGTCTATAGATTATTGCAGTACCCTTTTATTATATATTTCTTAAGC  
TAGGTAGATAGTTGGATAGATAATGTAGTGTACTTATAGTTGGTAAAGTAAGCATTAAATA  
GAGTTAAGATTAGGTTTATTATACTTAATGTTCTTATTTTATTATGAGACAGGACA  
GTGTGTCTGTGACTATATTTAATTTACTAGGCTAGTAAATACCTGTAGTCTAAACTGCT  
GAATATATTAAGATGTATAAATTAATTATAGGTTTAACTATTTAAGTGTAATAGTGTTATA  
GAGGTTTATGTGGAAATACCAACAGTAGAAGCATAGTTAGTATAGACAACTGTTAGTTA  
ATAGGATGATTTAATTATGTAGTAGAGCTTCTAGAGAGCCTATATAAGACAGGATACTTC  
TAAGTTAGTTAGTTAGTACTGTGACTCAGCACTAGTAAGCATTTAACTAAGGAATAAGA  
TAGGTTGAATAACCATACGCACGGGCGGAATTGAAAGATTAGTGTGGTGGTTGTTAATC  
TGAATATGATATGCCATAACACTAAAACCTTTATATAATGCGTCGAGGTCGATGTATAAG  
CGCCTAAGGGGGTTGAAATAGGCACGGAAAAGCAGACTATTAAATGTAGATTATAACT  
GATGGAATGCTTCAGTCTTATAATTAGTAGGAGTATTGATTGCCTTGCTAGTGGCGAATG  
CACAGCACTCAGGTCCTTTTAGAGGGGCTACCCTTAAAGTATATATGTCTTACGTTCCCTGTA  
AAGGCTTAATGATATAGGCATACTTGTTAATATAGTGGCGGAAGTATCTAGTAAGACCTA  
GATAGTGTCTAGTTGCTTGAGGTTGTGTAGGAATCCAAGGTATAAATAGTAGCAAGC  
TTTTCTTCAGGAGTAGATAGACCTAGGGCATCTATATATTATCCTAATAGCTGAATACTTA  
GGAATCTAATAAATACTTTAGTTAGTTCTAATTAGATACCAATATCTTGCAAGCGCTGTA  
GGACAGTGCTAAGGTGATTCAGATGCTTATTGAATGTTATAGAGGCAATGATAATATTAT  
TGATGTAGGTTCTGGCGAACTAAGGTTATTTAGGAGTTGATCTATTTGTTATTAGATATA  
TGGAACAGAATTAATAAATCCTATAATTATAATATTGAATATCTCCTAGCTGTGATGGCTG  
ATGACAGTAAGATAGTTTTGATGTGATTACTTTACCGGCCACTGGTAGAAGAACTGATA  
GGCATTGATGACTGTAATGTAATGGTAACTATAAACTATATTAATGATGTCTTCTTATATT  
AGGATAGGGTATAGATCTAGAATAACTTCCTTATTAATGCCATGTAAGTCAATGACTACA  
TGTCCTTTTCTTTAGTTTGGCTGTTCTGATCAGTGACGGTTTTCTATATAATAAAGACT  
AGATATACTAAAGGGGTATGACCAGTAGCAGGACTGAGTTTGCCAGCTTTACATAGAGG  
GTCAAATGTGCGATTAATGCATTCATGATCTTTGGGACTGACGTGATAGACATGTGGTTT  
AGGAAGATGGTTTCCCATCCTTCCTTCAAGGGAACCTCCATCTATTCTTCCCTGGGAAT  
ACGGGCTGTGGAGCTATTGTTGCCCTAGACATTAAGCTTATAAGTACTTCAGCAAGTT  
AGTTAGTTTTAGGGCCTTTGCTATATATAGTGATACCATTAGGTAAGACTGTCTAGTTATT  
ATGTTTGGGTGAAATGGTTAGTGAGGATTTGGGTTTACGCTGTTAGTTAGTAAGTATGTT  
TGAGTTGATGTTTGTGTTTCGCGGTATCTAGAGGAAGGGTGACTCAACTTGGTAGAC  
TTGAATCTAATGGTTCAGACTCTAATGGCTTAGCTAATGGAATAGTGCCTCGCTGACT  
TGGTAGGCAGTGATGAAGTTAGCATTAGAGATGGTCCCTATGTGAGCGTGATGAGTGA  
CTATAATTGGAGTGGGTGTTTTGTTGTGGACTTTAATGAAGGAGAACTCATGATTAAC  
ATATGTGTATATAGTGGCTCTGTTAAGGTTGATCCATCTAGTAGGTTAAAGATGAAG  
TTATGGTTAGCTGGTAAATCAGTCTTTAAATATACTGTTAGTTTACTGACTGAATATGCTG  
GTAGAAGAGACCTTTGCTTTGCATATACTACTATATAAGTGATCTGATGTGGTTTAGCTT

GCGTGATGATTAGGAAGGTTAATTAAGTAACTGTAAGAAGCTAATTGTTATAATACTATATTTAA  
AATTAAGTATGAATCCTTTACTGCAGATGACATTGGTTCTGATAAGTAGCTTAGGCTTTA  
GGCCATTAAGTAAATGGTAATAGATGGTAATCTTAGCGAATGTGTTTGCAGAACTACCAT  
TATTTATCAATCTAGGGAATCATAGTGTTAGCATAGCAGAACGGTTTGATTGATGATGGG  
ATCTGATGTCTGAAACTGTGATGCTGTCTGTAAGCTTGGTGATGGTTATACTAGGTAATA  
CTTTGATGAACTCTGTATTTCTAATGGTAGAGGAGCAGCCTGTATTAAGGCATATCTCAT  
GGTATTCTGATGTACTATTAATTCTGATCTTTATGGTAGTATAACACCAGGAATGGATTCC  
AACGAGCCTGGTTGGCTTGTGAGTAGATTTAATGATATAGACAGTAGTTGGGTTATTAG  
TAGTAGGGGTAACAGGGATTGGTTCCTGTGTGTGTGGATATTCTGAAAGATGGGTATAC  
AGATAATTCTGTGATGGGAATGTAGCCCTATATCTATTGTAGGTTGTGACCATAGGTCCA  
ACATTGACTGCAAATGTGCATGGTTTATCCTTAGATTCAGGGAAATCTCCGCGTTTGAA  
CGCCGGATGATTGAGGAATGCTTGATATCCTGGGTCCTCATCATCAGGCTGGTCGTGCT  
GGTCGTATGGTTTGTGTTGATTCAACATATGGTGAATATTCTGGTTCATTGTAAGTGGTG  
AAGGGGATGGATGTTTGACAGTTGGTTTGACATGTATGTCAGCAGCATAGGCTCGCTCT  
CTTAGGGGGCTAATGCGAGAAGGACCCTGGTTCATGACTGCCTACTGTTGTGATTCCA  
TATAGGATGGTTGTAGTTCACAGCGGTCCTATTTAGAGGTTGATTAGTTTGCTAATTTCC  
TTGCGGCTGAGTAGTTGCCTGTGGTTATGCTGGACTTTGGTATGAGGGATTCTGGTTTG  
ATGCAGGAGGCTGCTAACTGTACTGGTACTGCTGTATTTACTGGGTGAATGGGGATGTA  
TTTAGACATGGTTAGTATTGGTATTATGGATAGTAGGATCAGCTATACCTGTAAGTGGTTG  
ATGGATAGTATAGTCAGTTAGTCTGGGTTGGTTAGCTTAATGTTCCCTGTGGGGATTTGC  
CCTAGGTCCTTTGGGATTGCTAGTACTTGGGTTTACTATAAGGCTGGGTGCCCTTGTGTT  
GGTCCTTCTAGTAGCTATTGGTAATGTCCTTCCAGATACCAGAGTGGGACTCCAAGTGC  
TCGAGGAACTGGGTTAATATGGTGGTAGGGGTAGGTTTAGGAATGTTATACTAGAGATA  
TGCCTCAAGGCAGGTCTAACTATTATAATCTGGTTGAATGTATTATTAAGTGGCAGT  
GTGGGCATAATGAATAATATCTTATGCAAAGGCGCAGGGGTCCTGTCATTCCTAACATT  
ATTGTATCTATAAGAAAGGGATTATAACTTGACCAGAGTATTAGCAGTATATAGCCTAAA  
ATATTTTACTAGCTTAGGTAAGTATCTTTAGTCTAATAGAAGAGCATAAAGGGACTATTT  
TTCTAACTTAGTAAGTTTATTAGTGAAGTACTGCAATGTGGCGCCTTGAAGACTTGCTTA  
TAAGTTTGCTTTGATAAGGGTTACCTTTGTAATTAATTATATCTTTTATATAGTTAGTA  
AACATATTTATATCCTTATAGAATAGGCTTATGTTATACTGCTTGATGCTAGCATCTTCTAG  
TATATTAGGCTAGAAGTAACTAAGCTCTTTAGTTTCCAGTGTCTATTTGTTATAGTGGGT  
AATAGAAGGTTACTTACTAGTGGGTTGTTTAGCTGTGGTCTGTTAGGTAGTAGAAGGTG  
CTGTTGCTGAGACTATTGAGGTTGCTTATAATATTAGTTTACATTAGCAGCATTAATCTGT  
TTGTTAACTAAGGCCTTAAATTACTTAACTACCTTGCTATAGCTTCTTAGTTAGCATCTA  
GCTAATGATTCAAAGTCTGTTAGTTTACCTGGATTAGATTAATTAGGTCCTATACTAATG  
GACTGGGGTTAACTAGTATTTAATTTGAACTGCTCTGTTGGGCACTTATGTTAAATAATT  
AGTTTATAGAATGATGAGAGGGGTAGGATGGGTTTGTAGTAAATAGGATGGTTAATG  
ACAGGTGCTTATGGTTTAAATAACAGGCAGCTCTTCTTGAGGGAATAGCTACCTTATGGT  
TTGGCTAAGTAAAGCAGACCGCGAGCAGGAATAATATATAGGTTAGACTGTGGGTGGAT  
CATCTAGTTTAGTAGGAGGTCCCTGTGGAGTTACCACAGAATAATCAAATAGTATATGTT  
TAATAGTAGGTTTCAAGTTCACAGTCATCAGCTCATGTTTGGGTTGCAAGTTAGACTAT  
TTATTAGAGGATGTGGAACAGAATGGGATCTAGACTATATTCTACCTAATGGATATTTA  
GGTTATGGTTCATCAGTATTACAGTGCAGCTTAACTAGTGCTAGTATCCCCTGTCTTA  
AGTAATGGATGGGCTAAATATAGGAACTCCTAGGTGGCTCTGTTTAGTGTAGAGTAGTT

AATATTCTAATTAGGTGGGTATAGATGGAGATTTGATGATGCAGGAAGGGGTTTAGTGA  
ACTGGATGTATTAGGTAAGATAGATTATCTCTGTGTTGAACTGCTGAGTGAATAGGCTTT  
TAGACTAATTATAGAAAATACTAAGCTGATGTCTAAGCTCAGCAAGGCGCAGGGCCTGA  
CTAGTTATTAGTTAAAGAACCAGCAGTAAACAGTGGGACGTGAGACGGAGGGTATTTA  
ATCTAATGAAGGTAAGATGAGATGATGGTTAGTGGAGTATAGAATAGTAGGAGAAGAGT  
GGAGGTTGAGGGGTTGGACAGGCTGTGGTAGGGTGGAGGGCTTAGTAAGTAATAGTGT  
GGTTAGGGCTATGCCCTAGAGCTGCTGTAATCAGGGTGGGAATGATGTAATTAGATGAT  
GGGTCCCACAATGCTAAAAATGGTGTGATTGGTCAGTCGGAAGGATTGGGTAATCAC  
TAATAGGCCTTGGAATTCCTAAGGTTTCCAGCAGTAGTTGGTAATGATTAAACATACTA  
AAAGAGCTGATGTAAACCTAAGAGGAATACCTCTGGAACAAACATGGACATGCTACC  
AGGTTGTGGCAGACTAACATGATTTGAATGGTAAGTTGATTGTATTCTCATAAGATGGG  
GCTATCTGTCTACCTGTCTTGGATAACAGTATGGTTCAGCAAAGGAACCAACTGCGCAA  
CGGGACGGATAAACCATAGGCTGTTAGATACATGGATAAGTAATATATGGATTAGCGTAC  
GCTATGCGACA<sup>2</sup> TAATTATACTAGCTTCCTAATAAGCCTACATCTTTAGCCTGGATATGCT  
TTAATTCCTTTATCTTTTACCTCACTAGGCCTAGACTAAGGTGTTCTGGAAGTTATTTCTT  
AAAGTAATATGCCTAGGTCTTACTAACATATCTAGATATACTAGGCTTAGTGTGTTTAAAGT  
GCCTGATTTGCATACTCTTCTAGTAGCTTAGGCGTCACTGGTATGTTCTAATTATGTATAT  
AGTCTATTCACTGTATTAAGCTTCCTCCTAGTATTTCTTAAGAGCCTTATTAACCGGTTT  
TCTTACTGTGCGAGGCTGCGCGCCCTTCTTAATATGGTTATATAGTATAGTAATAGGAAC  
GCCATATTCACGCGTAATCTTGGAGATATTTGGTTTTTTTTTAGGCCTAAGCAGCTTTGCA  
GGCCTTATGGAGGTTAGAATTATTAATCTAATAGATTTTAGCATGTTGGTAAATTAGAA  
TAGCTTTAAATATCAAATATCTAAAATTGGTGGTTACAGTGTAATTGGTGGTTACAGTG  
CGGCGCACCCCTCAACGCGGAAGCGGTGAGGGTGCATGGCACGGA<sup>3</sup> TAATAGGTAAT  
AATGCAACTTGCGGCCTCTGATTTTATAGTACGGTGGTACTAGTGAGATATTTACCTCT  
CTTGTGTCTTGCCTAGGTACCTCAGGTTTCGAGGGTGGGCCTTATCATTTGGGATGGACG  
GAGCACACGGTACCTTACTTTATCAACCATAGTGCTGAATGATTGTTCCCTTTCTCGCTG  
GGAAAATCATCTCCAGCCTTCTTCTTTCAGTCTCTTTTCTCTTGGTTGATTACTATTTTC  
CCTTTTAAATACATACACGCTATGCGTTGATTTCACTTCATTCCCTTTTCCGAAACTC  
AAGCTATCGCAACCTTCTTCTGTTTAGTTTGACCGACCCATATCCTCTCAAGCCTCAG  
CCCCCTCAACACTGGGAGACATTGACAATGGCTCCTTCTGTGCTGCCCTTTTCGCGACAT  
CAACCTGCACGCCTCTCCCTCTCATTATGCATTCACCTTCTCCATCATCACCTAATGCTCA  
GACGCTCGTTGTCGACCGTCCAACCTGGCGACCTGCGACTTGCGGATGGTACCCTGTCC  
GGCGCGAAACGCATATCTAGCATCGCTGGTATCCTGGGTATGATCAAGCTCAAACCTGGG  
TAAGTTAAATGTATCTACGTCCTATCTCAGTTTCCATGCTAAGTGTTGCAGACAAATAC  
ATTATAGTCATAACAAAGGCCAGCCCATGGGTAGACTTCGTGGACACATGGTTTACAA  
GGTCGCCGCCACCGAGTTCTTGCCCCTCCGTGAGCGTCCACTGCACGATCATGATGAA  
GACACCTACCTGGCACTGTTGAAAGAATTGCTCCGAACCTGGACCGATGATTTTCTCCTA  
TGCATTGGATCTTACCAACAGCTTCCAGCGTCAATCTCAGAGTGACCCCAGCCTTCCCC  
TGTGGAAGCGCGCTGACGATCGTTTTTCTGGAATCGTTTCATTCAATCGGACTTGATA  
GATTTTAGTCTGGGGGCACATGATGCGACTGGTATGCGCTACGGCCCCCAACCGGGAG  
CCGACCCATTCATCTCCCGGTCAATTTGGAATGCTCCGTATTACCCCGGCCAGGGTCA

---

2 *Aspergillus fumigatus* retrotransposon *Afut4*

3 579bp flanking sequence

AATCAACATCATTACTTTTGCCTTATCACCAGGAGGTCTAGGCATCGTGGTGGAAACC  
AGATACTTCTCCCGCGGCATAGACGAGCACGGCCATGTTTCAAACATAATGAGACGG  
AACAGATCGTGATACTCAACGATGCGGCGGGAGGGCTTTCTGGTTTTGCGCCGGGACA  
GTCTATGGCCAAGGATAAATCCGGTGGCTCAGGCCAGGATCTCCAGATCATGTCCTTCG  
TCCAGACCCGAGGAAGTGTACCCGTCTACTGGGCCGAAGTGAACAACCTCAAGTACAT  
ACCGAAACTCCAGGTTCGCGGAGTGGAGACAGCTGTTGATGCTGCACGCAAGCATTTC  
TCGGAGCAAATCAGAATTTACGGCGAGAATTACATGGTCAATCTTGTCAACCAAAAAG  
GCAGAGAAGAGCGTGTGAAGACGGCCTACGAGCAGCTGGTACGCATATTGGTGTCTTC  
CTCGATCGAGGACACCGAGGCCGATGAAAACACCTCCGAGAAAGTCCATGTGGTAGA  
GTCCGGTCAGAAGCAAAAAGAAGTGGACCGCCTGCATTACATTTACTTCGATTTCCAC  
AATGAGACCAAAGGCCTGAGATGGCATCGCGCTGAGCTGCTTTTAGAACGTCTTGTCG  
ATGGACTCTCACGAGGCGGCTACTTCCGTGGGGTTGAAGACCCCGGTGCCCTGGCGG  
ATTGTTAGAAATTCGGTCCCTTCAGTCAAGCGTCGTCCGGACCAATTGCATGGACTGCC  
TTGACCGGACGAATGTGGTGCAGAGTATGCTTGGGCGATGGGCTGTGTCGCGGCAGCT  
CATGGACGCAGGAGTCCTTCGTCCAGGAGAAGCAGCTAACGATGATCGGGAGTTTGA  
GAACCTGTTTCGTAACATTTGGGCTGATAATGCCGATGTTGTCTCGAAAGCCTATTCCG  
GCACAGGAGCCCTCAAGACGGACTTCACGCGCACTGGTCAAAGAACCCGGGCTGGAA  
TGGTGCAGGATCTGTGTAATCTATTACCCGCTATATCCGCAACAACCTTCCTGGACGGCC  
CCAGACAAGATGGGTTTGATGTGTTCTTGGGCACCTATCTGCCTCCTGATTCTGCTCTT  
GGCAACATCCAGCTCTTCGTTGACCGCAGGCCGCTAATCATTAGTCAATCCCTTACAT  
TCTTGCTGCAGGCCTGTTTCATGATCTTTGTTTCCATTTTCACGAAGCGGTTGCCGGACT  
CTGCCGTCTGGCCTATCCGCATATTCATTTTTTCTGGGTAGTTGTTTCGGCCTGGTGTG  
CACGCTTCATCTTCGCACATGGCATGCTCTATGTAAGTTTCACCTTTACACCATTGTTG  
CATGGTCGTTTCGTCACCTAACATTCTGGTCATGTAG<sup>4</sup>

---

4 AFUA\_4G08050 phosphoinositide phosphatase Sac1, putative
